# Supplementary material for: Development of Alcohol Use Disorder as a Function of Age, Severity, and Comorbidity with Externalizing and Internalizing Disorders in a Young Adult Cohort
Source: PubMed Central journal article supplement (PMC6919651; doi:10.20900/jpbs.20190016), 2019-10-25
Supplement: NIHMS1056454-supplement-supplemental_File_1.pdf [file NIHMS1056454-supplement-supplemental_File_1.pdf]

## Supplementary Materials

### Sensitivity Analysis

We recoded the baseline comorbidity as follows:

if comor\_bsl in ("External", "Both") then EXT="Yes"; else EXT="No";

if comor\_bsl in ("Internal", "Both") then INT="Yes"; else INT="No";

Then we test whether the interaction of EXT and INT is significant. If it is not, we remove it from the model.

**Table S1.** Mild AUD.

| Analysis of Maximum Likelihood Estimates |                   |    |                    |                |            |            |              |                             |
|------------------------------------------|-------------------|----|--------------------|----------------|------------|------------|--------------|-----------------------------|
| Parameter                                |                   | DF | Parameter Estimate | Standard Error | Chi-Square | Pr > ChiSq | Hazard Ratio | Label                       |
| dm1c                                     | Female            | 1  | -0.33699           | 0.07746        | 18.9275    | <0.0001    | 0.714        | dm1c Female                 |
| ethnicity                                | African American  | 1  | 0.09709            | 0.24669        | 0.1549     | 0.6939     | 1.102        | ethnicity African American  |
| ethnicity                                | European American | 1  | 0.52354            | 0.24029        | 4.7470     | 0.0294     | 1.688        | ethnicity European American |
| TypeFAM                                  | 0                 | 1  | -0.30609           | 0.11626        | 6.9321     | 0.0085     | 0.736        | TypeFAM 0                   |
| EXT                                      | No                | 1  | -0.43215           | 0.08060        | 28.7493    | <0.0001    | 0.649        | EXT No                      |
| INT                                      | No                | 1  | 0.05629            | 0.12035        | 0.2188     | 0.6400     | 1.058        | INT No                      |

| Hazard Ratios for dm1c |                |                            |       |
|------------------------|----------------|----------------------------|-------|
| Description            | Point Estimate | 95% Wald Confidence Limits |       |
| dm1c Female vs Male    | 0.714          | 0.613                      | 0.831 |

| Hazard Ratios for ethnicity                     |                |                            |       |
|-------------------------------------------------|----------------|----------------------------|-------|
| Description                                     | Point Estimate | 95% Wald Confidence Limits |       |
| ethnicity African American vs European American | 0.653          | 0.551                      | 0.773 |
| ethnicity African American vs Other             | 1.102          | 0.679                      | 1.787 |
| ethnicity European American vs Other            | 1.688          | 1.054                      | 2.703 |

| Hazard Ratios for TypeFAM |                |                            |       |
|---------------------------|----------------|----------------------------|-------|
| Description               | Point Estimate | 95% Wald Confidence Limits |       |
| TypeFAM 0 vs 1            | 0.736          | 0.586                      | 0.925 |

| <b>Hazard Ratios for EXT</b> |                       |                                   |       |
|------------------------------|-----------------------|-----------------------------------|-------|
| <b>Description</b>           | <b>Point Estimate</b> | <b>95% Wald Confidence Limits</b> |       |
| <b>EXT No vs Yes</b>         | 0.649                 | 0.554                             | 0.760 |

| <b>Hazard Ratios for INT</b> |                       |                                   |       |
|------------------------------|-----------------------|-----------------------------------|-------|
| <b>Description</b>           | <b>Point Estimate</b> | <b>95% Wald Confidence Limits</b> |       |
| <b>INT No vs Yes</b>         | 1.058                 | 0.836                             | 1.339 |

Table S2. Moderate AUD.

| <b>Analysis of Maximum Likelihood Estimates</b> |                          |           |                           |                       |                   |                      |                     |                             |
|-------------------------------------------------|--------------------------|-----------|---------------------------|-----------------------|-------------------|----------------------|---------------------|-----------------------------|
| <b>Parameter</b>                                |                          | <b>DF</b> | <b>Parameter Estimate</b> | <b>Standard Error</b> | <b>Chi-Square</b> | <b>Pr &gt; ChiSq</b> | <b>Hazard Ratio</b> | <b>Label</b>                |
| <b>dm1c</b>                                     | <b>Female</b>            | 1         | -0.49120                  | 0.10135               | 23.4876           | <0.0001              | 0.612               | dm1c Female                 |
| <b>ethnicity</b>                                | <b>African American</b>  | 1         | -0.84174                  | 0.24302               | 11.9970           | 0.0005               | 0.431               | ethnicity African American  |
| <b>ethnicity</b>                                | <b>European American</b> | 1         | -0.03497                  | 0.22664               | 0.0238            | 0.8774               | 0.966               | ethnicity European American |
| <b>TypeFAM</b>                                  | <b>0</b>                 | 1         | -0.97938                  | 0.20410               | 23.0268           | <0.0001              | 0.376               | TypeFAM 0                   |
| <b>EXT</b>                                      | <b>No</b>                | 1         | -0.72638                  | 0.10289               | 49.8354           | <0.0001              | 0.484               | EXT No                      |
| <b>INT</b>                                      | <b>No</b>                | 1         | -0.32432                  | 0.12724               | 6.4967            | 0.0108               | 0.723               | INT No                      |

| <b>Hazard Ratios for dm1c</b> |                       |                                   |       |
|-------------------------------|-----------------------|-----------------------------------|-------|
| <b>Description</b>            | <b>Point Estimate</b> | <b>95% Wald Confidence Limits</b> |       |
| <b>dm1c Female vs Male</b>    | 0.612                 | 0.502                             | 0.746 |

| <b>Hazard Ratios for ethnicity</b>                     |                       |                                   |       |
|--------------------------------------------------------|-----------------------|-----------------------------------|-------|
| <b>Description</b>                                     | <b>Point Estimate</b> | <b>95% Wald Confidence Limits</b> |       |
| <b>ethnicity African American vs European American</b> | 0.446                 | 0.353                             | 0.565 |
| <b>ethnicity African American vs Other</b>             | 0.431                 | 0.268                             | 0.694 |
| <b>ethnicity European American vs Other</b>            | 0.966                 | 0.619                             | 1.506 |

| Hazard Ratios for TypeFAM |                |                            |       |
|---------------------------|----------------|----------------------------|-------|
| Description               | Point Estimate | 95% Wald Confidence Limits |       |
| TypeFAM 0 vs 1            | 0.376          | 0.252                      | 0.560 |

| Hazard Ratios for EXT |                |                            |       |
|-----------------------|----------------|----------------------------|-------|
| Description           | Point Estimate | 95% Wald Confidence Limits |       |
| EXT No vs Yes         | 0.484          | 0.395                      | 0.592 |

| Hazard Ratios for INT |                |                            |       |
|-----------------------|----------------|----------------------------|-------|
| Description           | Point Estimate | 95% Wald Confidence Limits |       |
| INT No vs Yes         | 0.723          | 0.563                      | 0.928 |

Table S3. Severe AUD.

| Analysis of Maximum Likelihood Estimates |                   |    |                    |                |            |            |              |                             |
|------------------------------------------|-------------------|----|--------------------|----------------|------------|------------|--------------|-----------------------------|
| Parameter                                |                   | DF | Parameter Estimate | Standard Error | Chi-Square | Pr > ChiSq | Hazard Ratio | Label                       |
| dm1c                                     | Female            | 1  | -0.35835           | 0.11508        | 9.6962     | 0.0018     | 0.699        | dm1c Female                 |
| ethnicity                                | African American  | 1  | -1.46388           | 0.23796        | 37.8449    | <0.0001    | 0.231        | ethnicity African American  |
| ethnicity                                | European American | 1  | -0.46109           | 0.21186        | 4.7367     | 0.0295     | 0.631        | ethnicity European American |
| TypeFAM                                  | 0                 | 1  | -1.13628           | 0.25066        | 20.5498    | <0.0001    | 0.321        | TypeFAM 0                   |
| EXT                                      | No                | 1  | -1.26470           | 0.12310        | 105.5528   | <0.0001    | 0.282        | EXT No                      |
| INT                                      | No                | 1  | -0.51987           | 0.13301        | 15.2770    | <0.0001    | 0.595        | INT No                      |

| Hazard Ratios for dm1c |                |                            |       |
|------------------------|----------------|----------------------------|-------|
| Description            | Point Estimate | 95% Wald Confidence Limits |       |
| dm1c Female vs Male    | 0.699          | 0.558                      | 0.876 |

| Hazard Ratios for ethnicity                     |                |                            |       |
|-------------------------------------------------|----------------|----------------------------|-------|
| Description                                     | Point Estimate | 95% Wald Confidence Limits |       |
| ethnicity African American vs European American | 0.367          | 0.277                      | 0.487 |
| ethnicity African American vs Other             | 0.231          | 0.145                      | 0.369 |
| ethnicity European American vs Other            | 0.631          | 0.416                      | 0.955 |

| <b>Hazard Ratios for TypeFAM</b> |                       |                                   |       |
|----------------------------------|-----------------------|-----------------------------------|-------|
| <b>Description</b>               | <b>Point Estimate</b> | <b>95% Wald Confidence Limits</b> |       |
| <b>TypeFAM 0 vs 1</b>            | 0.321                 | 0.196                             | 0.525 |

| <b>Hazard Ratios for EXT</b> |                       |                                   |       |
|------------------------------|-----------------------|-----------------------------------|-------|
| <b>Description</b>           | <b>Point Estimate</b> | <b>95% Wald Confidence Limits</b> |       |
| <b>EXT No vs Yes</b>         | 0.282                 | 0.222                             | 0.359 |

| <b>Hazard Ratios for INT</b> |                       |                                   |       |
|------------------------------|-----------------------|-----------------------------------|-------|
| <b>Description</b>           | <b>Point Estimate</b> | <b>95% Wald Confidence Limits</b> |       |
| <b>INT No vs Yes</b>         | 0.595                 | 0.458                             | 0.772 |
